# Supplementary material
Source: PubMed Central journal article supplement (PMC2797876)

Scribble

ZO-1

Merged

16HBE-140- cells

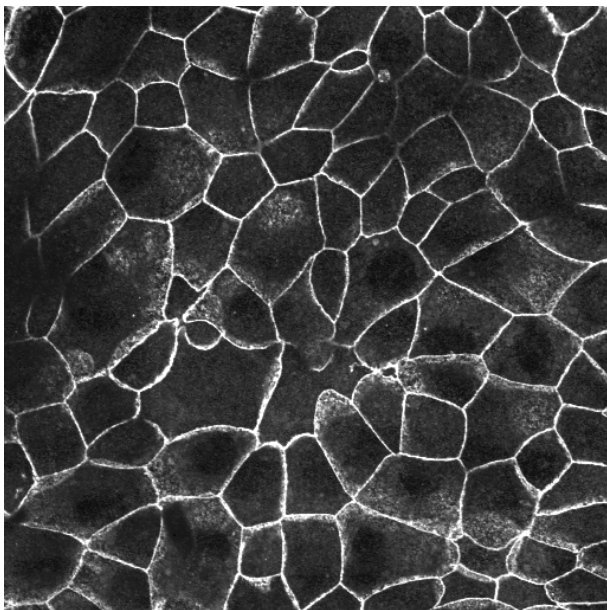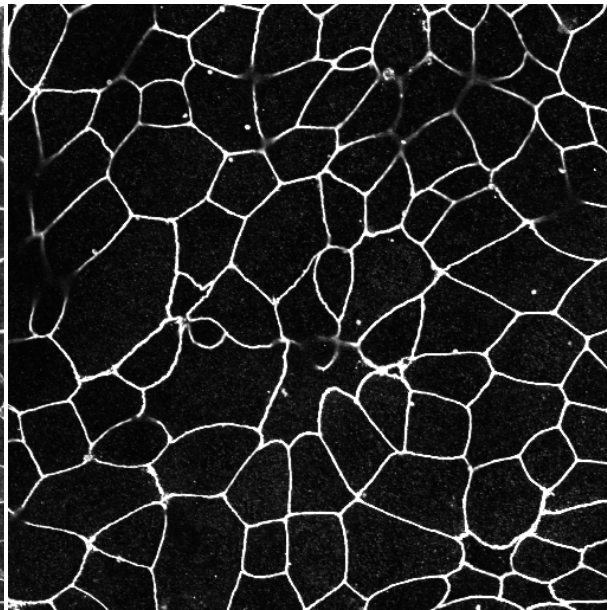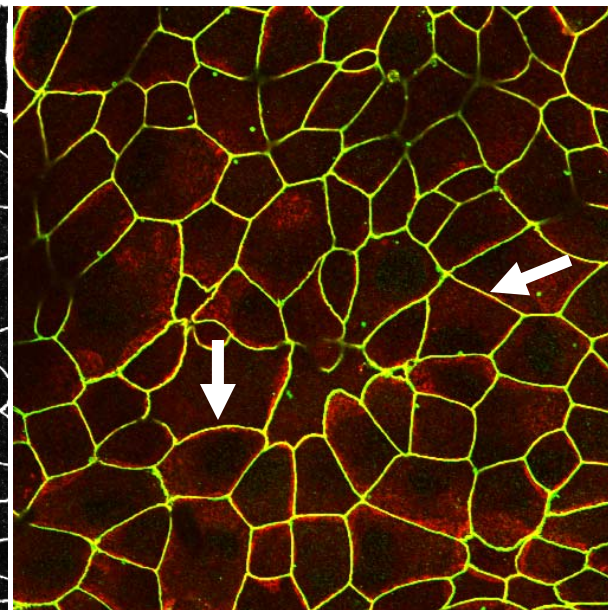

HPAF-II cells

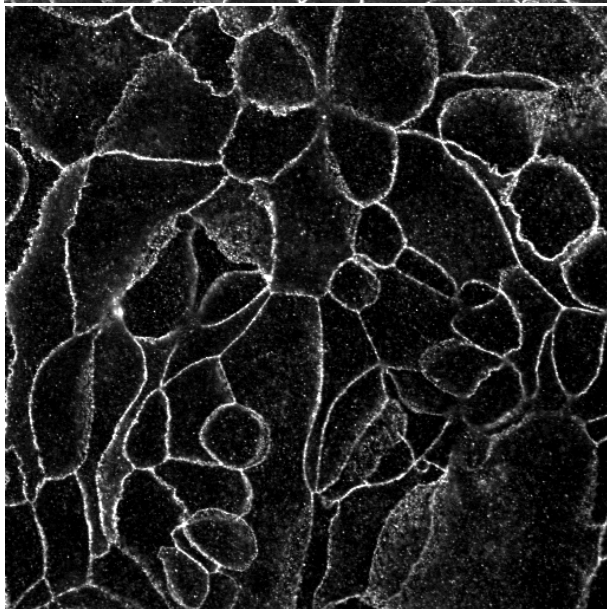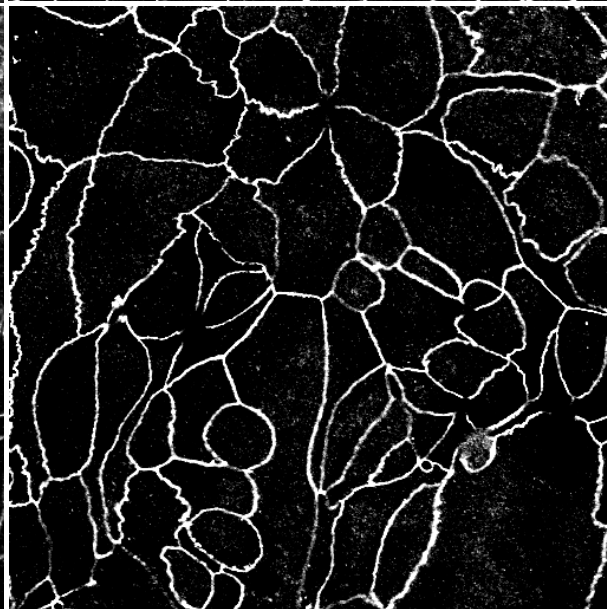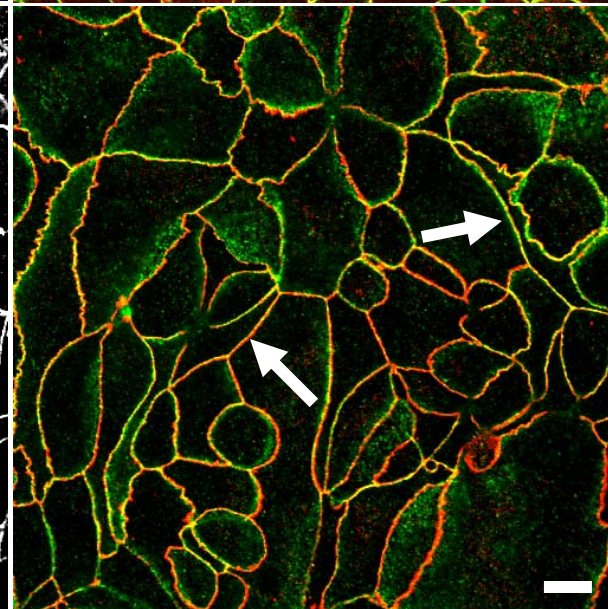

Supplement: mmc1.pdf [file mmc1.pdf]

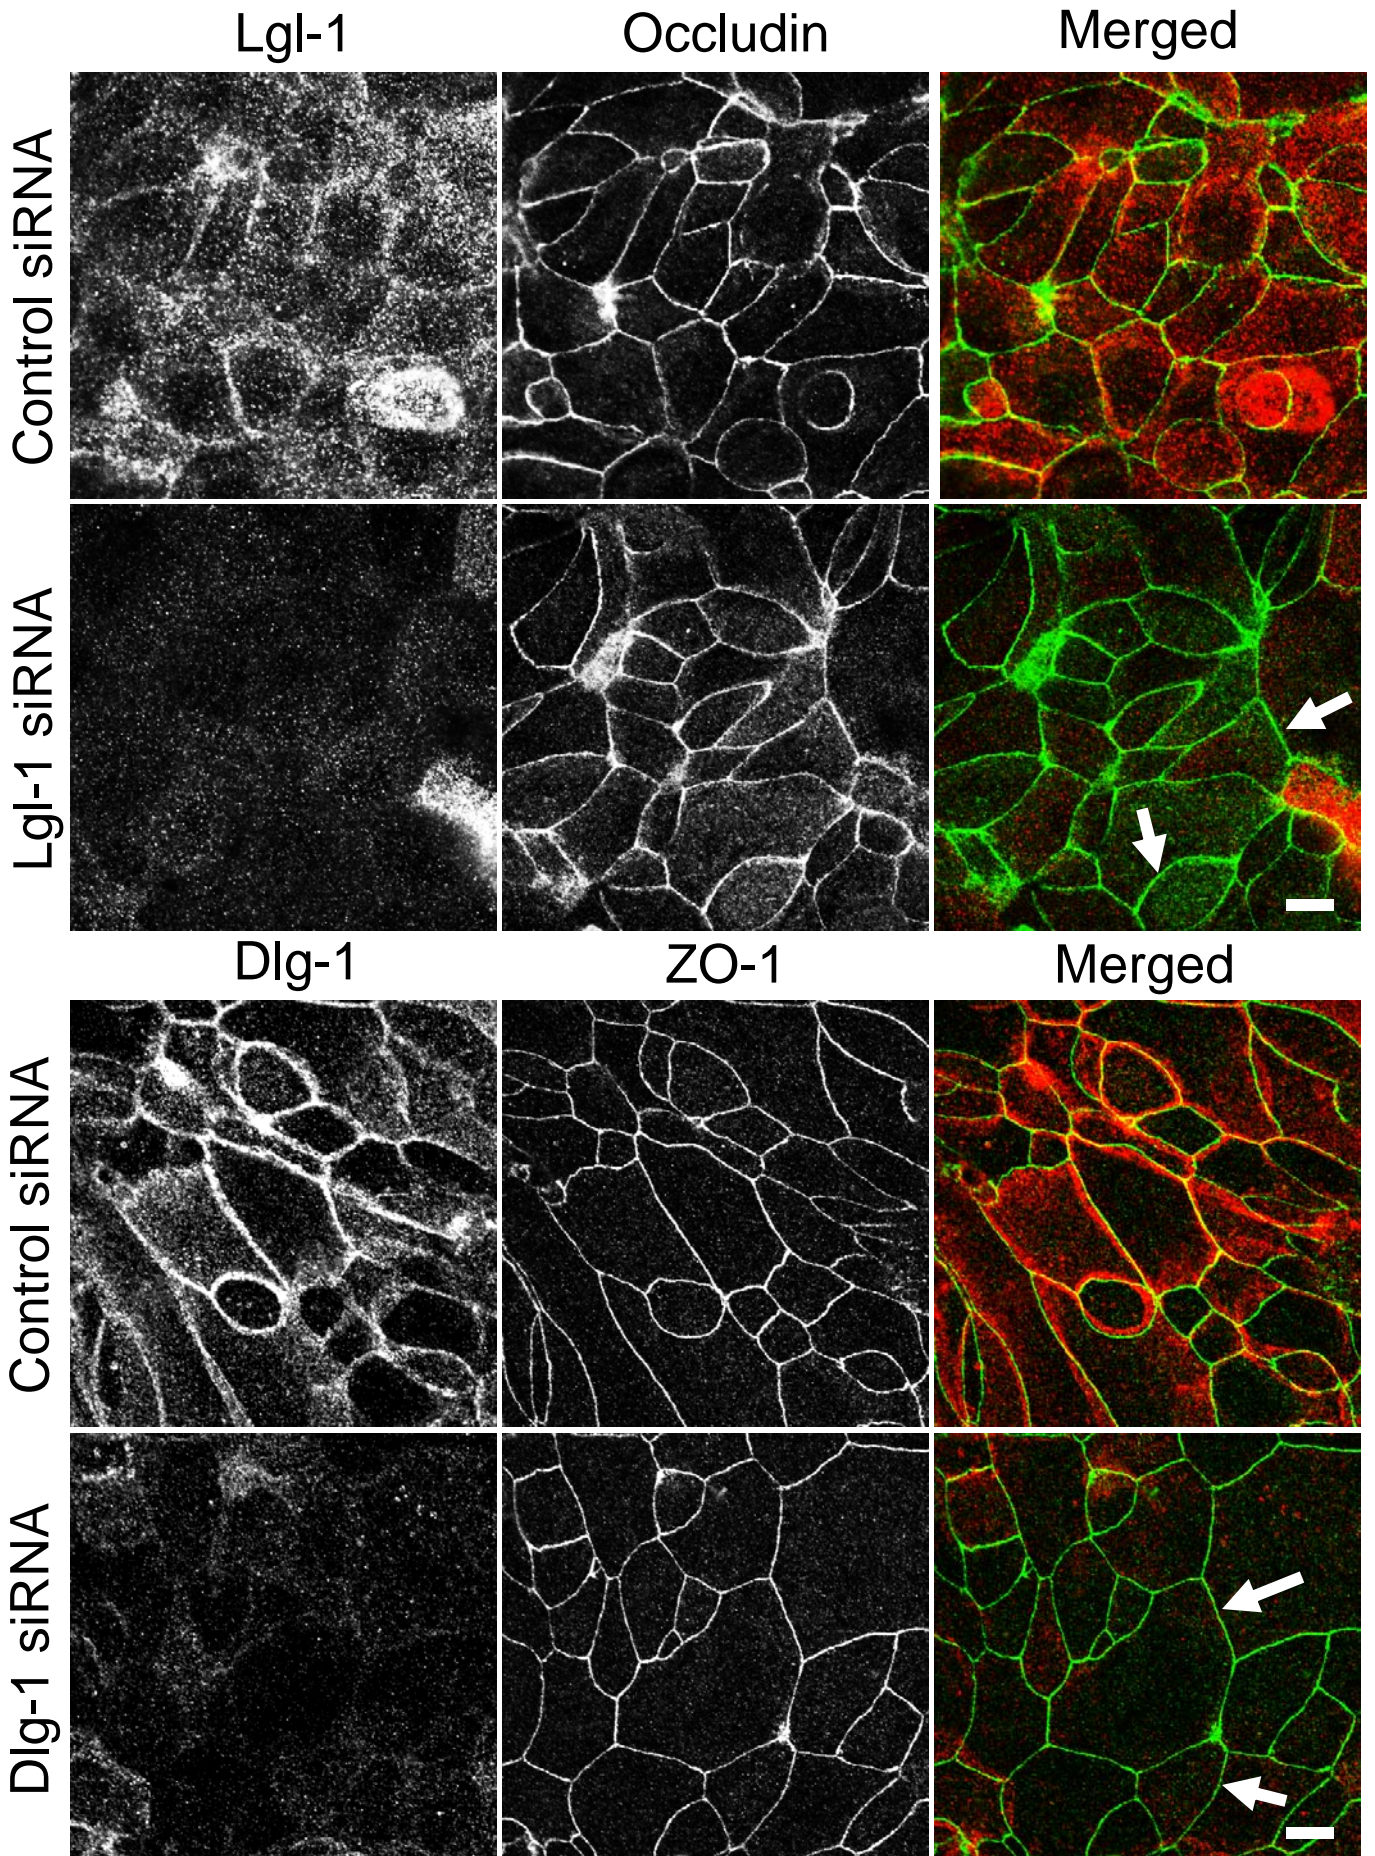

Supplement: mmc10.pdf [file mmc10.pdf]

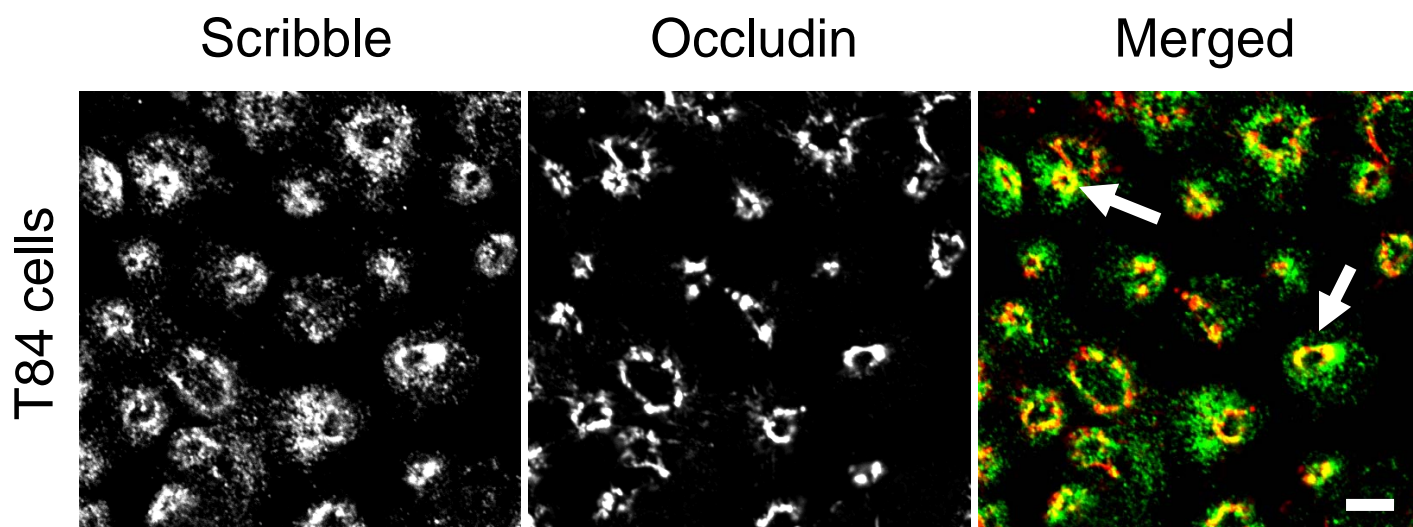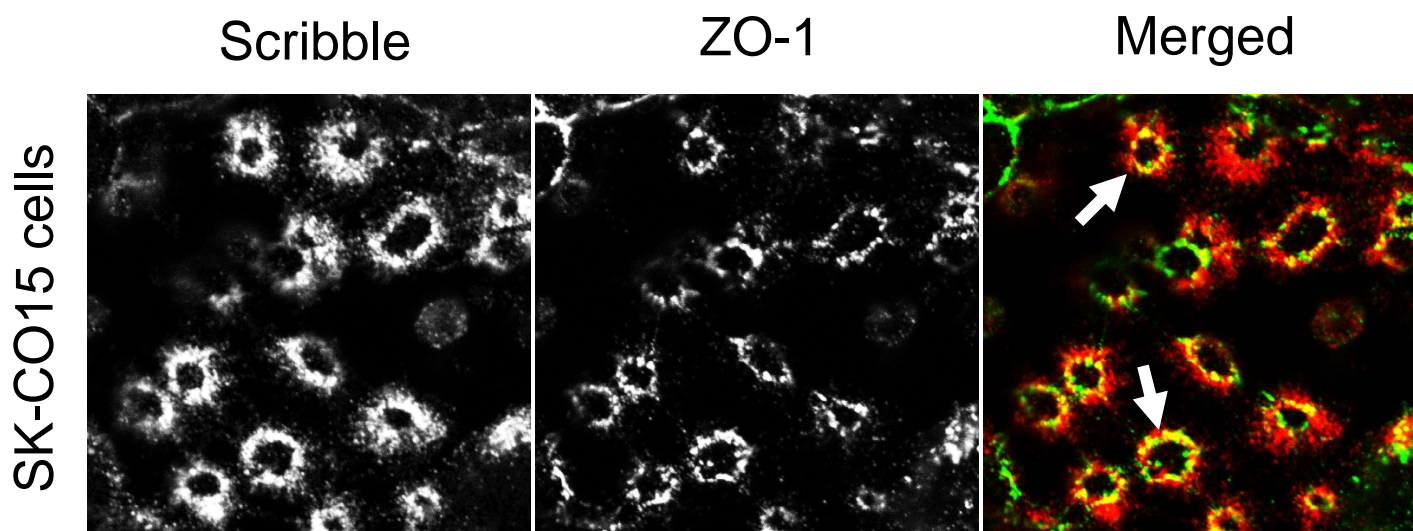

Supplement: mmc2.pdf [file mmc2.pdf]

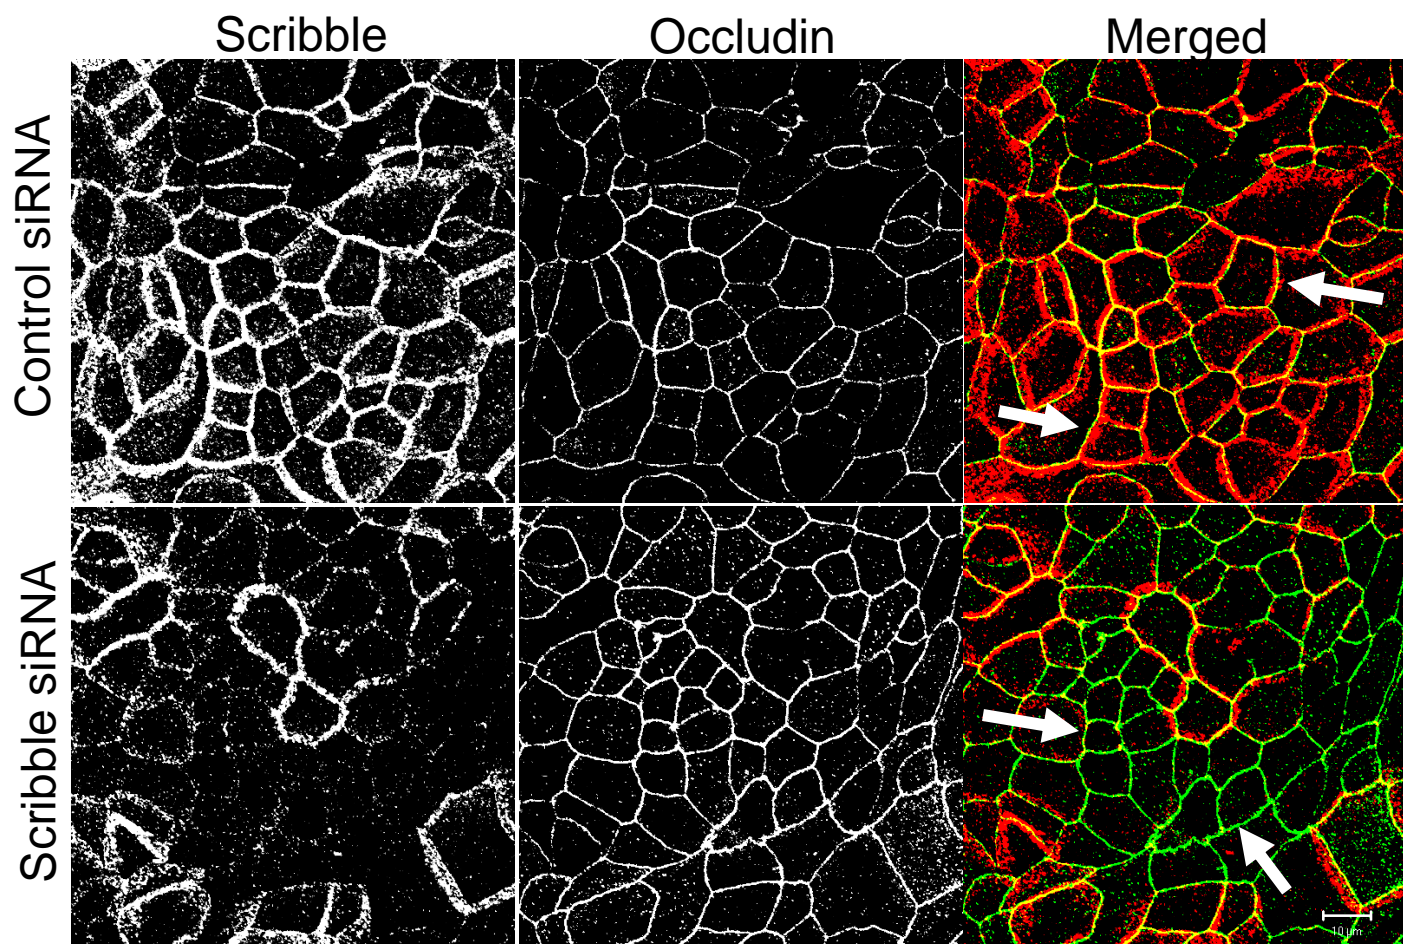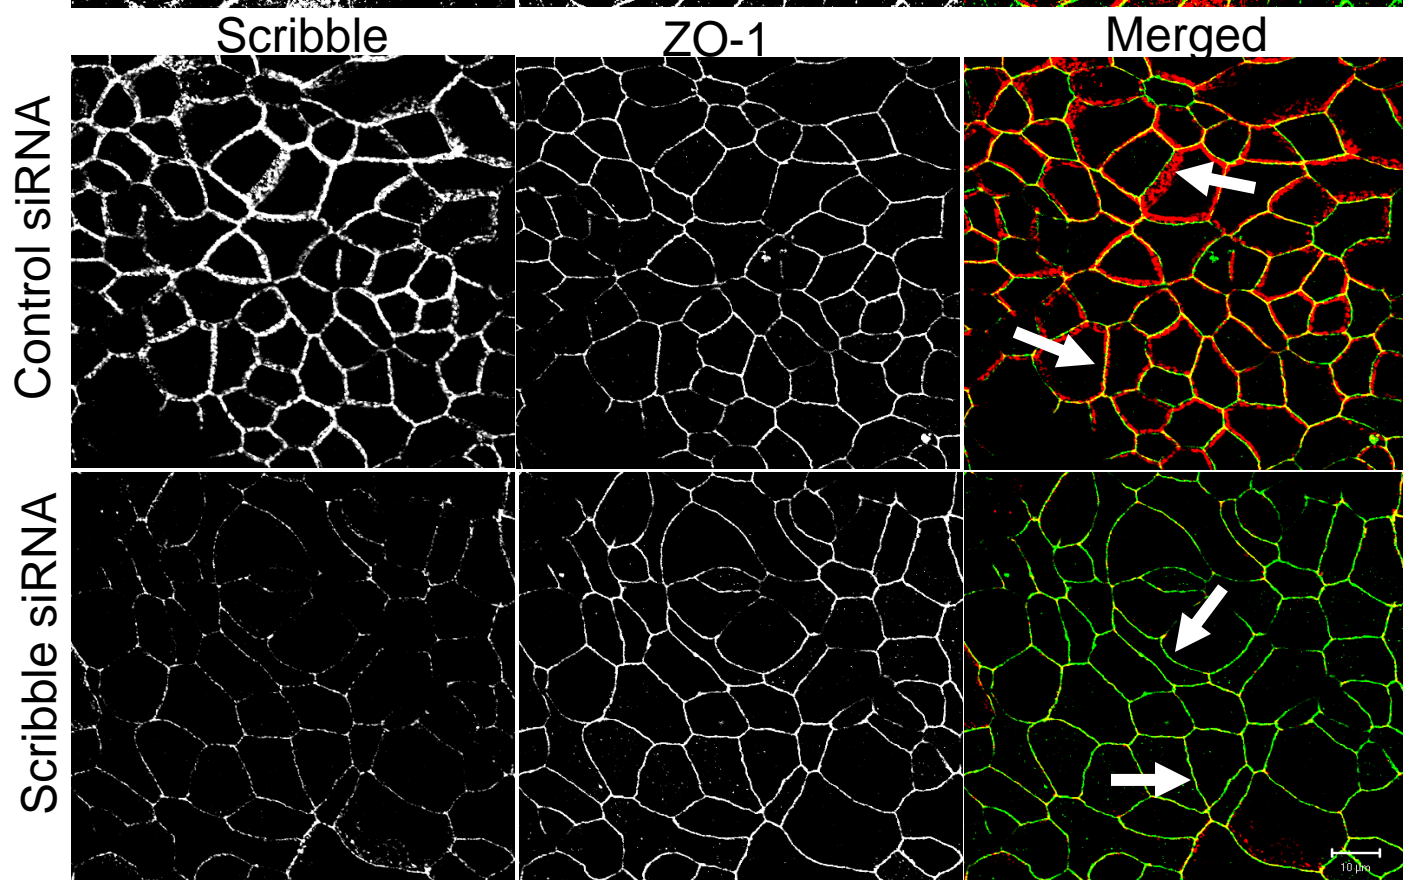

Supplement: mmc3.pdf [file mmc3.pdf]

Control siRNA  
Scribble siRNA, 50 nM  
Scribble siRNA, 100 nM

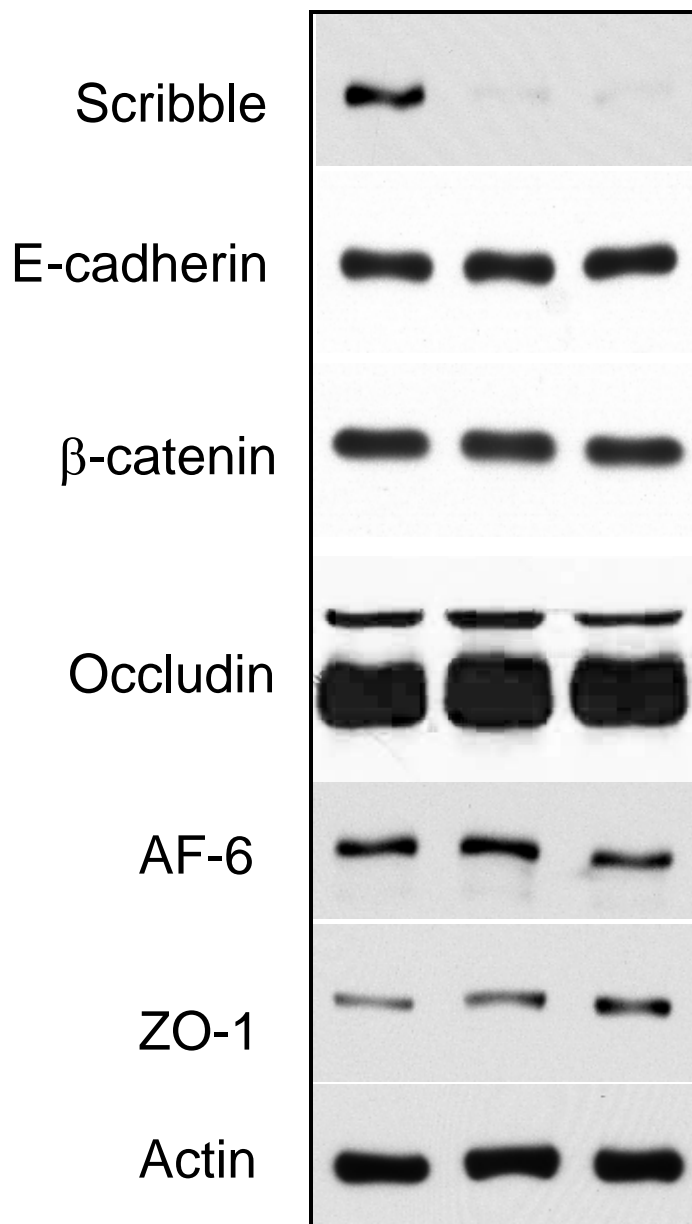

Supplement: mmc4.pdf [file mmc4.pdf]

Scribble siRNA Control siRNA

Scribble

Ezrin

Merged

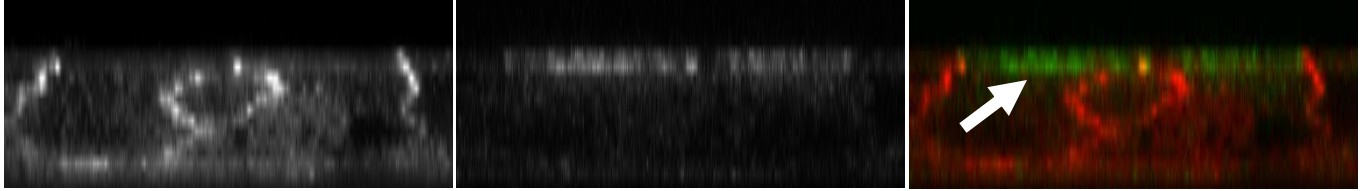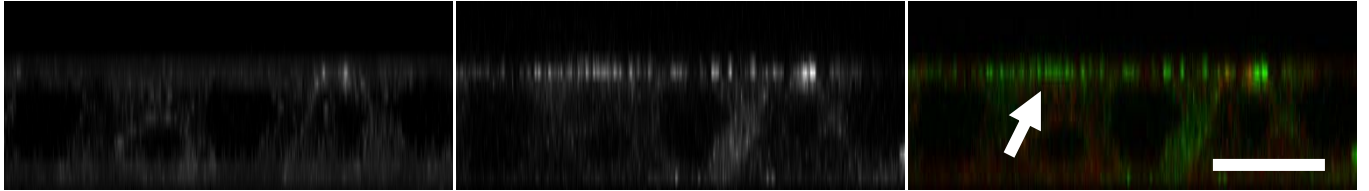

Supplement: mmc5.pdf [file mmc5.pdf]

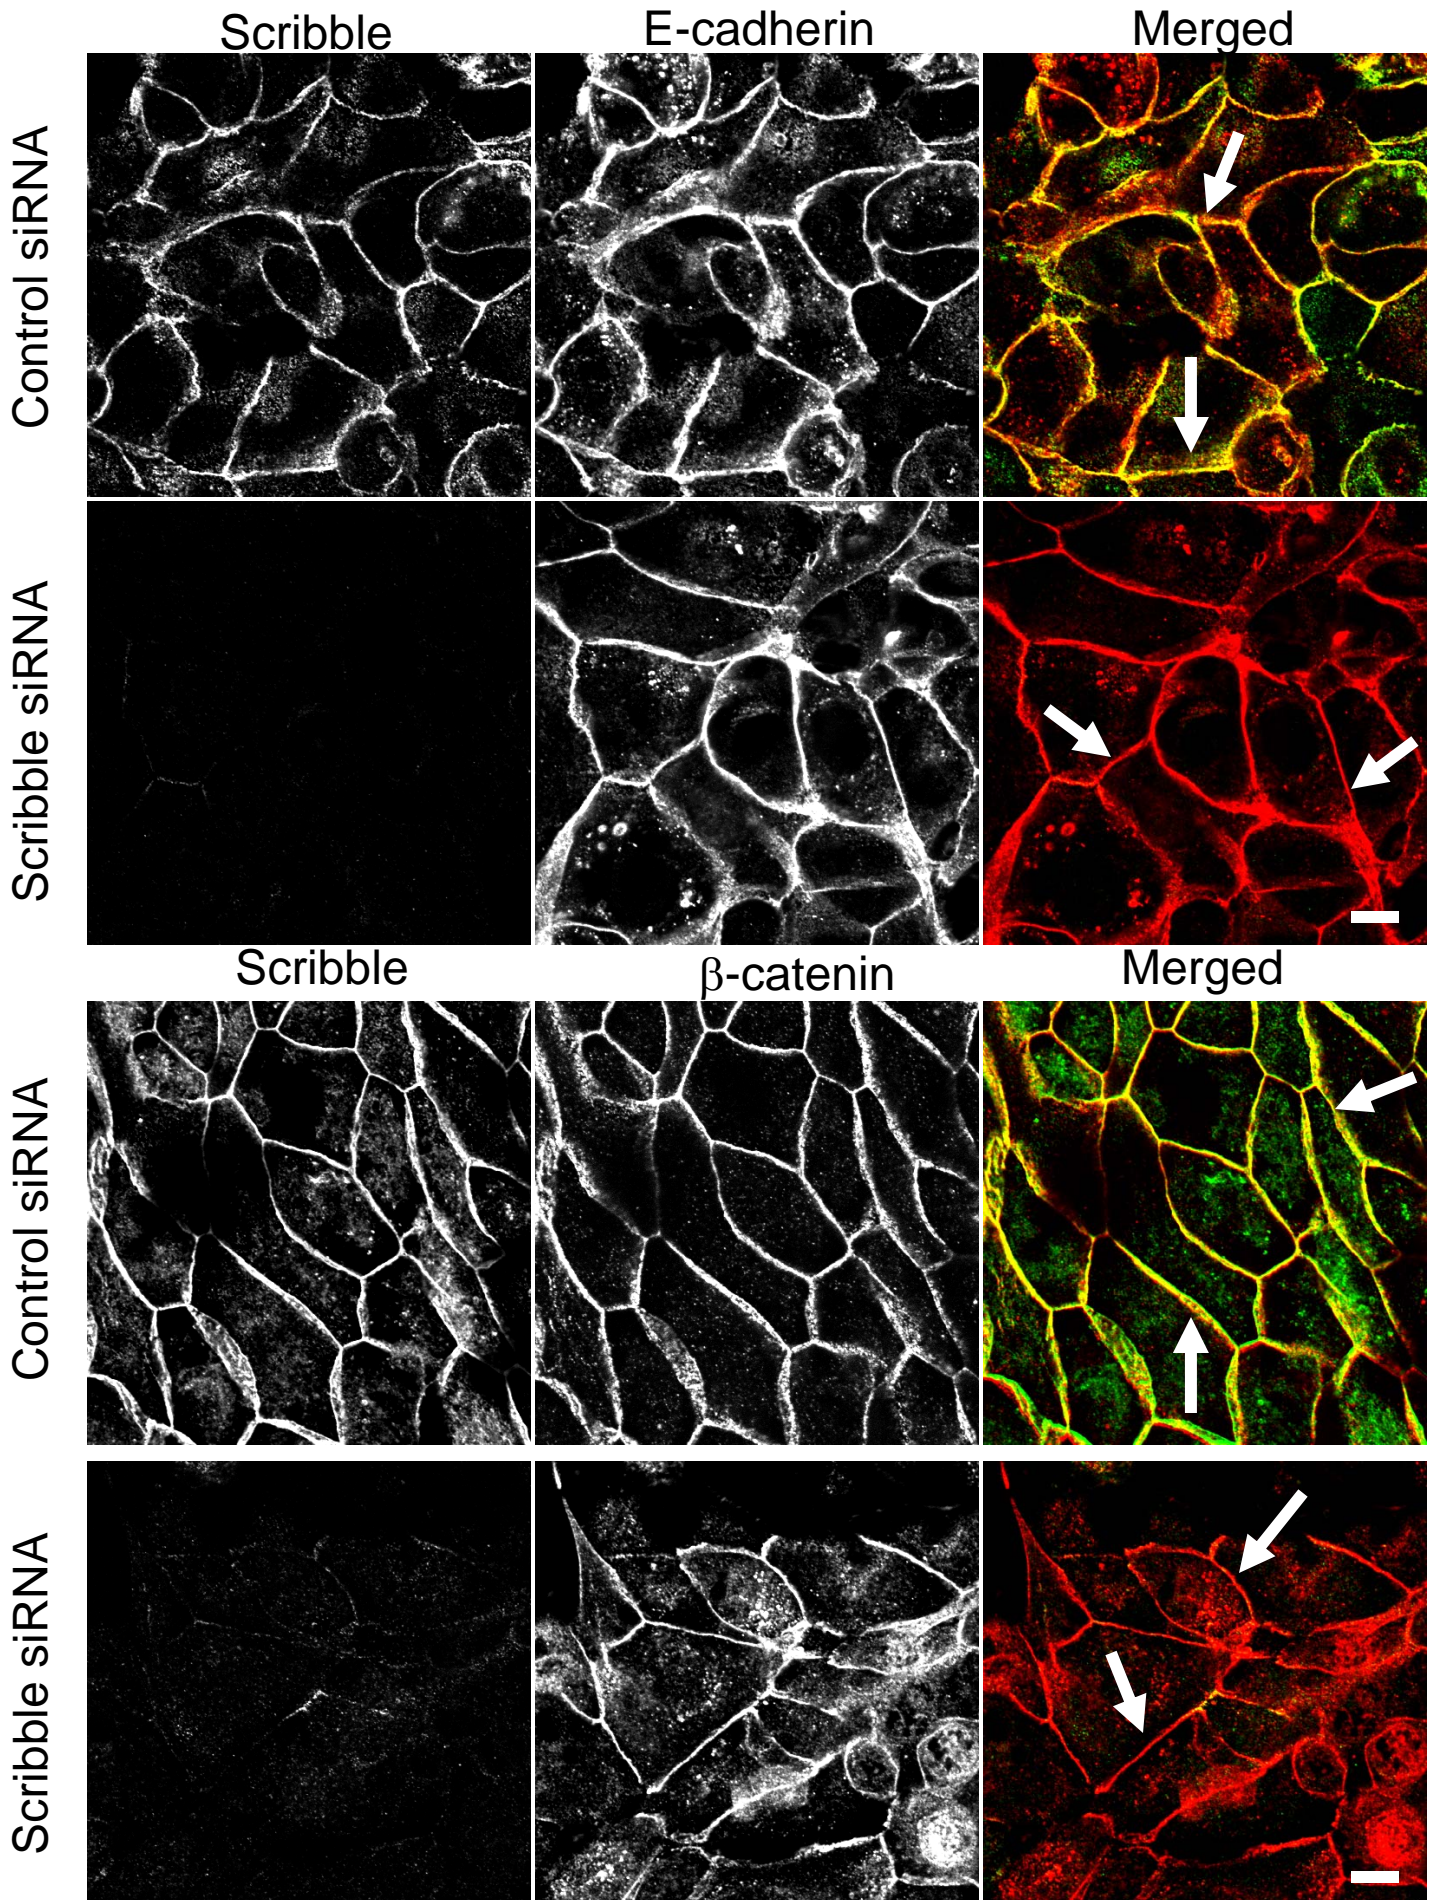

Supplement: mmc6.pdf [file mmc6.pdf]

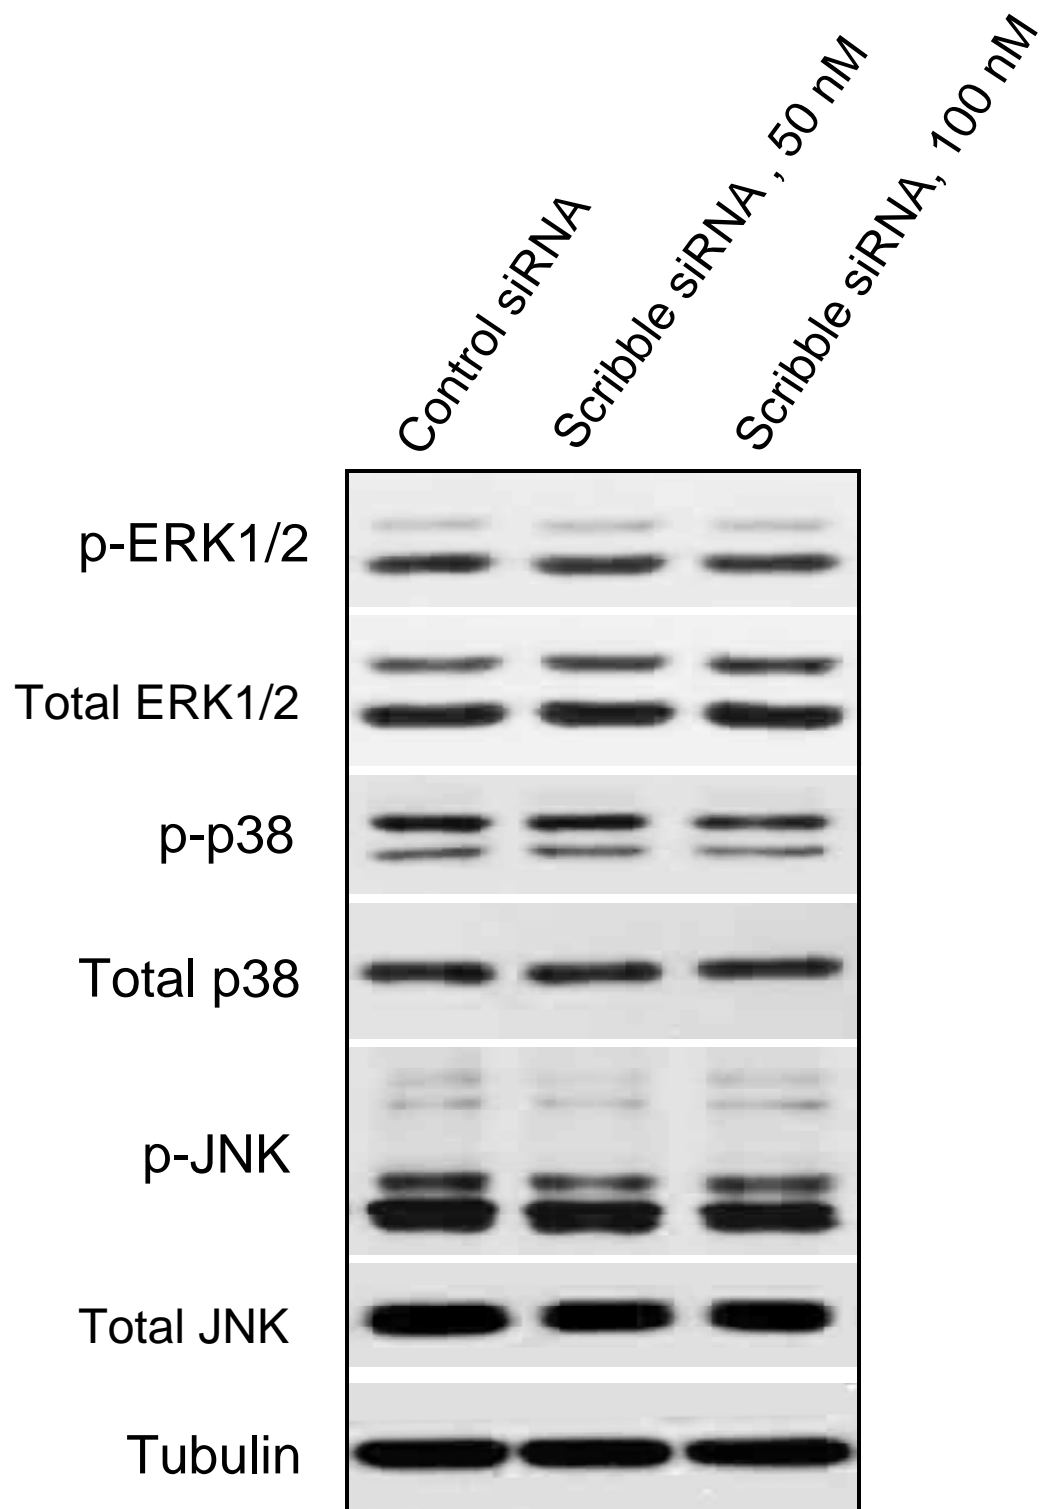

Supplement: mmc7.pdf [file mmc7.pdf]

Scribble

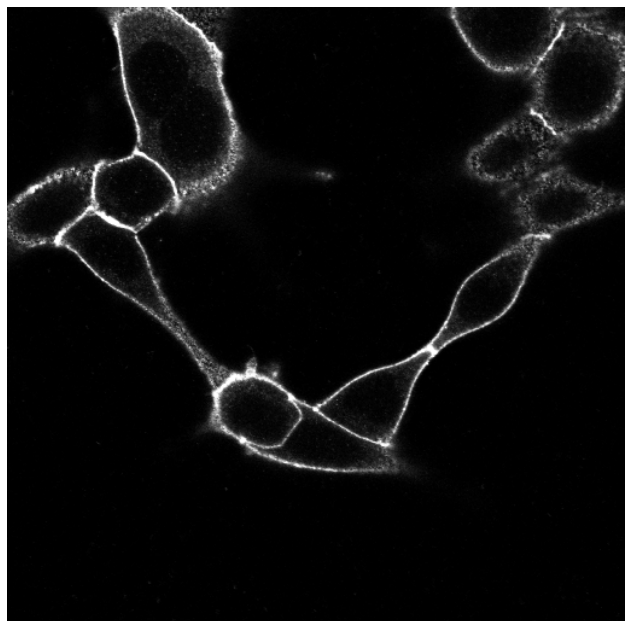

ZO-1

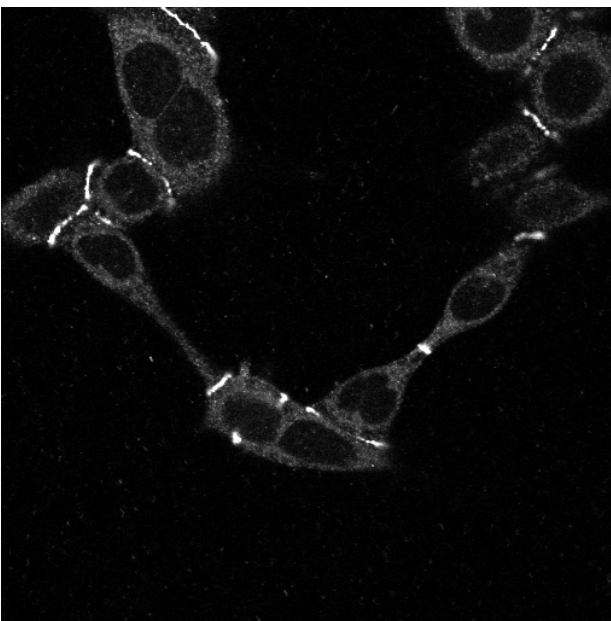

Merged

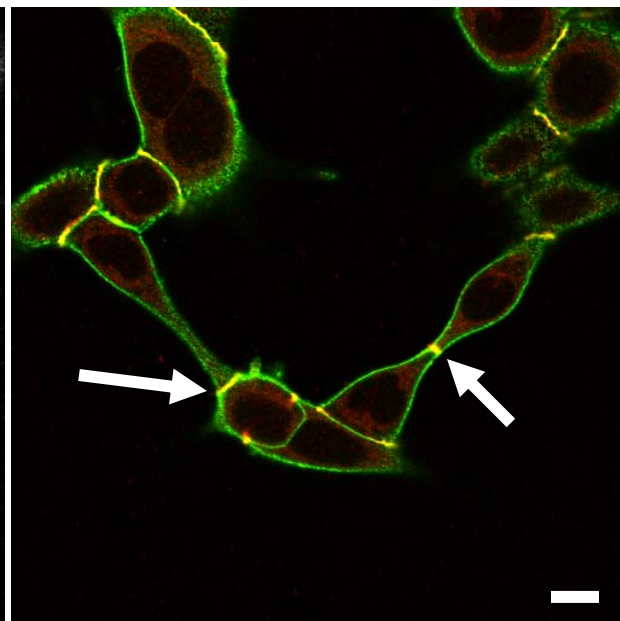

Supplement: mmc8.pdf [file mmc8.pdf]

DLG-1

Occludin

Merged

Normal calcium

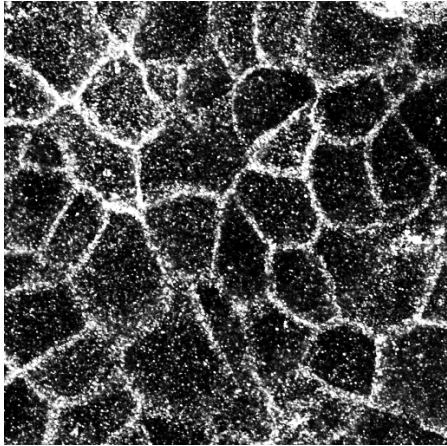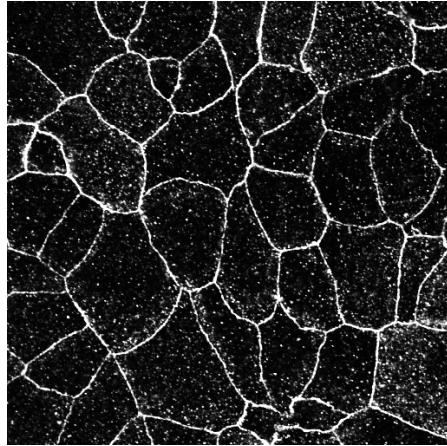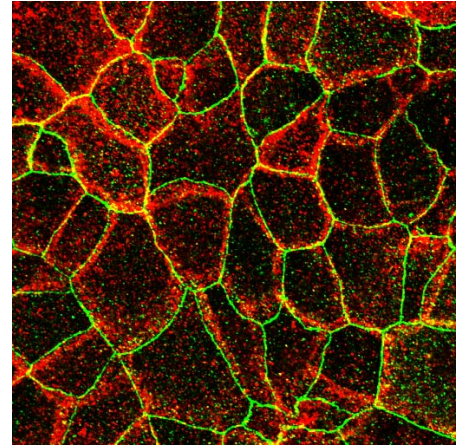

No calcium

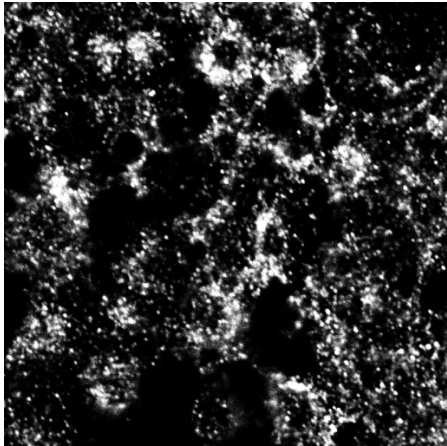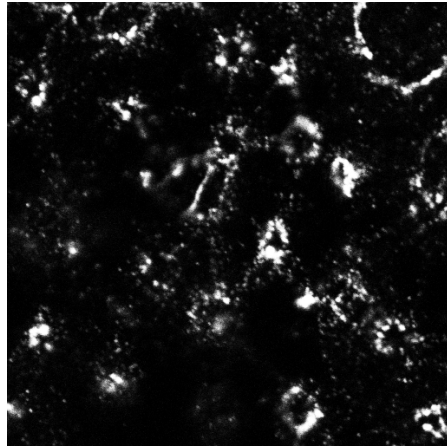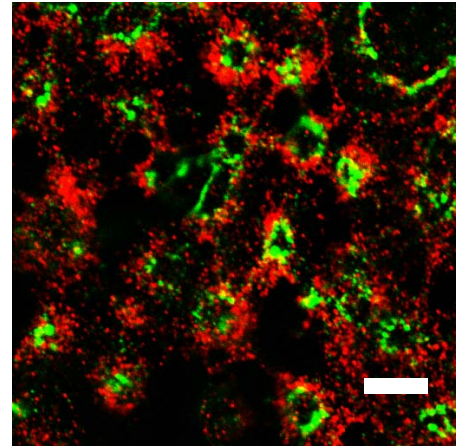

Supplement: mmc9.pdf [file mmc9.pdf]
